# Supplementary material for: Step-by-step from amorphous phosphate to nano-structured calcium hydroxyapatite: monitoring by solid-state 1H and 31P NMR and spin dynamics
Source: Royal Society of Chemistry journal article supplement (doi:10.1039/d2cp02108k), 2022-01-01
Supplement: d2cp02108k1.pdf [file d2cp02108k1.pdf]

## Electronic supplementary information

### **Step-by-step from amorphous phosphate to nano-structured calcium hydroxyapatite: monitoring by solid-state $^1\text{H}$ and $^{31}\text{P}$ NMR and spin dynamics**

Vytautas Klimavicius<sup>1</sup>, Arūnas Maršalka<sup>1</sup>, Agne Kizalaite<sup>2</sup>, Aleksej Zarkov<sup>2</sup>, Aivaras Kareiva<sup>2</sup>,  
Kęstutis Aidas<sup>1</sup>, Jérôme Hirschinger<sup>3</sup>, Vytautas Balevicius<sup>1\*</sup>

<sup>1</sup>*Institute of Chemical Physics, Vilnius University, LT-10257 Vilnius, Lithuania*

<sup>2</sup>*Institute of Chemistry, Vilnius University, LT-03225 Vilnius, Lithuania*

<sup>3</sup>*Institut de Chimie, Université de Strasbourg, UMR 7177 CNRS, Strasbourg, France*

#### **1. Details of synthesis**

*Synthesis I.* Producing the sample containing AMP, the  $\text{Zn}^{2+}$  ions were introduced as an inhibitor of hydroxyapatite crystallization. Calcium hydrogen phosphate dihydrate ( $\text{CaHPO}_4 \cdot 2\text{H}_2\text{O}$ , 99.1 %, Eurochemicals) and zinc acetate dihydrate ( $\text{Zn}(\text{CH}_3\text{COO})_2 \cdot 2\text{H}_2\text{O}$ ,  $\geq 99.5\%$ , Roth) were used as starting materials. All chemicals were used as received without additional purification. In a typical synthesis, certain amounts of  $\text{CaHPO}_4 \cdot 2\text{H}_2\text{O}$  and  $\text{Zn}(\text{CH}_3\text{COO})_2$  corresponding to Ca-to-Zn molar ratios of 9 were dissolved in a mixture of 100 ml of distilled water and 13 ml of 1 M phosphoric acid ( $\text{H}_3\text{PO}_4$ , 75 %, Roth). Total concentration of metal ions in the reaction mixture was 0.065 M. Temperature of the obtained solution was set to 75 °C and the mixture was stirred for 1 h. Next, under constant mixing on a magnetic stirrer, concentrated ammonia solution ( $\text{NH}_4\text{OH}$ , 25 %, Roth) was added in order to adjust the pH to 5.6. The increase of the pH value of the reaction medium resulted in instantaneous formation of white precipitates, which were instantly filtered and dried without aging in the reaction mixture.<sup>5</sup>

*Synthesis II.* The composite sample containing AMP and nano-CaHA was synthesized by wet precipitation method using calcium nitrate tetrahydrate ( $\text{Ca}(\text{NO}_3)_2 \cdot 4\text{H}_2\text{O}$ ,  $\geq 99\%$ , Roth) and diammonium hydrogen phosphate ( $(\text{NH}_4)_2\text{HPO}_4$ ,  $\geq 98\%$ , Roth) as starting materials. For the synthesis an appropriate amount of  $\text{Ca}(\text{NO}_3)_2 \cdot 4\text{H}_2\text{O}$  was dissolved in deionized water resulting in 0.75 M solution. Next, concentrated ammonia solution ( $\text{NH}_4\text{OH}$ , 25 %) was added to the above solution in order to adjust pH to 10. In parallel 0.5 M  $(\text{NH}_4)_2\text{HPO}_4$  solution in deionized water was prepared. Next, under constant stirring on magnetic stirrer, the prepared solutions were mixed together resulting in the instant formation of white precipitates. The obtained precipitates were stirred in the reaction mixture for 10 minutes, afterwards vacuum filtered and washed with deionized water and dried at 50 °C overnight in the oven.<sup>6</sup>

*Synthesis III.* The high-crystalline nano-CaHA sample was obtained by the sol–gel process. Calcium acetate monohydrate,  $\text{Ca}(\text{CH}_3\text{COO})_2 \cdot \text{H}_2\text{O}$ , and ammonium hydrogen phosphate,  $(\text{NH}_4)_2\text{HPO}_4$ , were selected as Ca and P sources, respectively, in Ca/P mole ratio 1.67. The mixture of calcium acetate and ammonium hydrogen phosphate was stirred at 60 - 65 °C for 1 h. The tartaric acid was selected as complexing agent. Obtained mixture was vigorously stirred for 12 h at 60 - 65 °C in a beaker covered with a watch glass. After evaporation of solvent, the transparent white gels were obtained. The gels were dried in an oven for 10 h at 110 °C. The obtained powders were grinded in agate mortar and heated to 800 °C for 5 h and repeatedly two times at 1000 °C for 5 h.

## 2. DFT

### 2.1 Atomic coordinates used in the calculations of hexagonal CaHA with ‘up’ and ‘down’ configurations of hydroxyl groups.

OH up

|    |       |          |          |
|----|-------|----------|----------|
| Ca | 0.    | 5.44095  | 0.01032  |
| Ca | 9.424 | 10.8819  | 20.62668 |
| Ca | 4.712 | 13.60237 | 0.01032  |

|    |         |          |          |
|----|---------|----------|----------|
| Ca | 4.712   | 2.72047  | 20.62668 |
| Ca | 9.424   | 10.8819  | 3.44982  |
| Ca | 0.      | 5.44095  | 3.42918  |
| Ca | 4.712   | 2.72047  | 3.44982  |
| Ca | 4.712   | 13.60237 | 3.42918  |
| Ca | 0.      | 5.44095  | 6.88932  |
| Ca | 9.424   | 10.8819  | 13.74768 |
| Ca | 4.712   | 13.60237 | 6.88932  |
| Ca | 4.712   | 2.72047  | 13.74768 |
| Ca | 9.424   | 10.8819  | 10.32882 |
| Ca | 0.      | 5.44095  | 17.18718 |
| Ca | 4.712   | 2.72047  | 10.32882 |
| Ca | 4.712   | 13.60237 | 17.18718 |
| Ca | 0.      | 5.44095  | 13.76832 |
| Ca | 9.424   | 10.8819  | 6.86868  |
| Ca | 4.712   | 13.60237 | 13.76832 |
| Ca | 4.712   | 2.72047  | 6.86868  |
| Ca | 9.424   | 10.8819  | 17.20782 |
| Ca | 0.      | 5.44095  | 10.30818 |
| Ca | 4.712   | 2.72047  | 17.20782 |
| Ca | 4.712   | 13.60237 | 10.30818 |
| Ca | 9.424   | 5.44095  | 0.01032  |
| Ca | 0.      | 10.8819  | 20.62668 |
| Ca | 0.      | 10.8819  | 3.44982  |
| Ca | 9.424   | 5.44095  | 3.42918  |
| Ca | 9.424   | 5.44095  | 6.88932  |
| Ca | 0.      | 10.8819  | 13.74768 |
| Ca | 0.      | 10.8819  | 10.32882 |
| Ca | 9.424   | 5.44095  | 17.18718 |
| Ca | 9.424   | 5.44095  | 13.76832 |
| Ca | 0.      | 10.8819  | 6.86868  |
| Ca | 0.      | 10.8819  | 17.20782 |
| Ca | 9.424   | 5.44095  | 10.30818 |
| Ca | 3.58018 | 10.22953 | 1.71975  |
| Ca | 5.84382 | 6.09332  | 18.91725 |
| Ca | 5.84382 | 6.09332  | 5.15925  |
| Ca | 3.58018 | 10.22953 | 8.59875  |
| Ca | 5.84382 | 6.09332  | 12.03825 |
| Ca | 3.58018 | 10.22953 | 15.47775 |
| Ca | 7.06894 | 8.10756  | 1.71975  |
| Ca | 2.35506 | 8.21529  | 18.91725 |
| Ca | 2.35506 | 8.21529  | 5.15925  |
| Ca | 7.06894 | 8.10756  | 8.59875  |
| Ca | 2.35506 | 8.21529  | 12.03825 |
| Ca | 7.06894 | 8.10756  | 15.47775 |
| Ca | 3.48688 | 6.14718  | 1.71975  |
| Ca | 5.93712 | 10.17566 | 18.91725 |
| Ca | 5.93712 | 10.17566 | 5.15925  |
| Ca | 3.48688 | 6.14718  | 8.59875  |
| Ca | 5.93712 | 10.17566 | 12.03825 |

|    |          |          |          |
|----|----------|----------|----------|
| Ca | 3.48688  | 6.14718  | 15.47775 |
| P  | 2.02098  | 3.00748  | 1.71975  |
| P  | 7.40302  | 13.31536 | 18.91725 |
| P  | 7.40302  | 13.31536 | 5.15925  |
| P  | 2.02098  | 3.00748  | 8.59875  |
| P  | 7.40302  | 13.31536 | 12.03825 |
| P  | 2.02098  | 3.00748  | 15.47775 |
| P  | 1.09695  | 8.4079   | 1.71975  |
| P  | 8.32705  | 7.91495  | 18.91725 |
| P  | 1.59407  | 13.06889 | 1.71975  |
| P  | 7.82993  | 3.25396  | 18.91725 |
| P  | 8.32705  | 7.91495  | 5.15925  |
| P  | 7.82993  | 3.25396  | 5.15925  |
| P  | 1.09695  | 8.4079   | 8.59875  |
| P  | 8.32705  | 7.91495  | 12.03825 |
| P  | 1.59407  | 13.06889 | 8.59875  |
| P  | 7.82993  | 3.25396  | 12.03825 |
| P  | 1.09695  | 8.4079   | 15.47775 |
| P  | 1.59407  | 13.06889 | 15.47775 |
| P  | 10.52095 | 8.4079   | 1.71975  |
| P  | -1.09695 | 7.91495  | 18.91725 |
| P  | 6.30607  | 4.90746  | 1.71975  |
| P  | 3.11793  | 11.41538 | 18.91725 |
| P  | -1.09695 | 7.91495  | 5.15925  |
| P  | 3.11793  | 11.41538 | 5.15925  |
| P  | 10.52095 | 8.4079   | 8.59875  |
| P  | -1.09695 | 7.91495  | 12.03825 |
| P  | 6.30607  | 4.90746  | 8.59875  |
| P  | 3.11793  | 11.41538 | 12.03825 |
| P  | 10.52095 | 8.4079   | 15.47775 |
| P  | 6.30607  | 4.90746  | 15.47775 |
| P  | 6.73298  | 11.16891 | 1.71975  |
| P  | 2.69102  | 5.15394  | 18.91725 |
| P  | 2.69102  | 5.15394  | 5.15925  |
| P  | 6.73298  | 11.16891 | 8.59875  |
| P  | 2.69102  | 5.15394  | 12.03825 |
| P  | 6.73298  | 11.16891 | 15.47775 |
| O  | 0.81046  | 3.95666  | 1.71975  |
| O  | 8.61354  | 12.36619 | 18.91725 |
| O  | 8.61354  | 12.36619 | 5.15925  |
| O  | 0.81046  | 3.95666  | 8.59875  |
| O  | 8.61354  | 12.36619 | 12.03825 |
| O  | 0.81046  | 3.95666  | 15.47775 |
| O  | 0.8802   | 6.88498  | 1.71975  |
| O  | 8.5438   | 9.43787  | 18.91725 |
| O  | 3.02134  | 13.64264 | 1.71975  |
| O  | 6.40266  | 2.68021  | 18.91725 |
| O  | 8.5438   | 9.43787  | 5.15925  |
| O  | 6.40266  | 2.68021  | 5.15925  |
| O  | 0.8802   | 6.88498  | 8.59875  |

O 8.5438 9.43787 12.03825  
O 3.02134 13.64264 8.59875  
O 6.40266 2.68021 12.03825  
O 0.8802 6.88498 15.47775  
O 3.02134 13.64264 15.47775  
O 10.3042 6.88498 1.71975  
O -0.8802 9.43787 18.91725  
O 7.73333 5.48121 1.71975  
O 1.69067 10.84163 18.91725  
O -0.8802 9.43787 5.15925  
O 1.69067 10.84163 5.15925  
O 10.3042 6.88498 8.59875  
O -0.8802 9.43787 12.03825  
O 7.73333 5.48121 8.59875  
O 1.69067 10.84163 12.03825  
O 10.3042 6.88498 15.47775  
O 7.73333 5.48121 15.47775  
O 5.52246 12.11808 1.71975  
O 3.90154 4.20477 18.91725  
O 3.90154 4.20477 5.15925  
O 5.52246 12.11808 8.59875  
O 3.90154 4.20477 12.03825  
O 5.52246 12.11808 15.47775  
O 3.34316 3.79588 1.71975  
O 6.08084 12.52697 18.91725  
O 6.08084 12.52697 5.15925  
O 3.34316 3.79588 8.59875  
O 6.08084 12.52697 12.03825  
O 3.34316 3.79588 15.47775  
O -0.24691 9.15875 1.71975  
O 9.67091 7.1641 18.91725  
O 1.61574 11.52964 1.71975  
O 7.80825 4.7932 18.91725  
O 9.67091 7.1641 5.15925  
O 7.80825 4.7932 5.15925  
O -0.24691 9.15875 8.59875  
O 9.67091 7.1641 12.03825  
O 1.61574 11.52964 8.59875  
O 7.80825 4.7932 12.03825  
O -0.24691 9.15875 15.47775  
O 1.61574 11.52964 15.47775  
O 9.17709 9.15875 1.71975  
O 0.24691 7.1641 18.91725  
O 6.32775 3.36822 1.71975  
O 3.09626 12.95463 18.91725  
O 0.24691 7.1641 5.15925  
O 3.09626 12.95463 5.15925  
O 9.17709 9.15875 8.59875  
O 0.24691 7.1641 12.03825  
O 6.32775 3.36822 8.59875

|   |          |          |          |
|---|----------|----------|----------|
| O | 3.09626  | 12.95463 | 12.03825 |
| O | 9.17709  | 9.15875  | 15.47775 |
| O | 6.32775  | 3.36822  | 15.47775 |
| O | 8.05516  | 11.9573  | 1.71975  |
| O | 1.36884  | 4.36555  | 18.91725 |
| O | 1.36884  | 4.36555  | 5.15925  |
| O | 8.05516  | 11.9573  | 8.59875  |
| O | 1.36884  | 4.36555  | 12.03825 |
| O | 8.05516  | 11.9573  | 15.47775 |
| O | 2.0238   | 2.10483  | 0.48291  |
| O | 7.4002   | 14.21801 | 20.1541  |
| O | 7.4002   | 14.21801 | 3.92241  |
| O | 2.0238   | 2.10483  | 2.95659  |
| O | 2.0238   | 2.10483  | 7.36191  |
| O | 7.4002   | 14.21801 | 13.2751  |
| O | 7.4002   | 14.21801 | 10.80141 |
| O | 2.0238   | 2.10483  | 16.71459 |
| O | 2.0238   | 2.10483  | 14.24091 |
| O | 7.4002   | 14.21801 | 6.39609  |
| O | 7.4002   | 14.21801 | 17.68041 |
| O | 2.0238   | 2.10483  | 9.83559  |
| O | 1.87726  | 8.86167  | 0.48291  |
| O | 7.54674  | 7.46117  | 20.1541  |
| O | 0.81093  | 13.51777 | 0.48291  |
| O | 8.61307  | 2.80508  | 20.1541  |
| O | 7.54674  | 7.46117  | 3.92241  |
| O | 1.87726  | 8.86167  | 2.95659  |
| O | 8.61307  | 2.80508  | 3.92241  |
| O | 0.81093  | 13.51777 | 2.95659  |
| O | 1.87726  | 8.86167  | 7.36191  |
| O | 7.54674  | 7.46117  | 13.2751  |
| O | 0.81093  | 13.51777 | 7.36191  |
| O | 8.61307  | 2.80508  | 13.2751  |
| O | 7.54674  | 7.46117  | 10.80141 |
| O | 1.87726  | 8.86167  | 16.71459 |
| O | 8.61307  | 2.80508  | 10.80141 |
| O | 0.81093  | 13.51777 | 16.71459 |
| O | 1.87726  | 8.86167  | 14.24091 |
| O | 7.54674  | 7.46117  | 6.39609  |
| O | 0.81093  | 13.51777 | 14.24091 |
| O | 8.61307  | 2.80508  | 6.39609  |
| O | 7.54674  | 7.46117  | 17.68041 |
| O | 1.87726  | 8.86167  | 9.83559  |
| O | 8.61307  | 2.80508  | 17.68041 |
| O | 0.81093  | 13.51777 | 9.83559  |
| O | 11.30126 | 8.86167  | 0.48291  |
| O | -1.87726 | 7.46117  | 20.1541  |
| O | 5.52294  | 5.35634  | 0.48291  |
| O | 3.90107  | 10.9665  | 20.1541  |
| O | -1.87726 | 7.46117  | 3.92241  |

|   |          |          |          |
|---|----------|----------|----------|
| O | 11.30126 | 8.86167  | 2.95659  |
| O | 3.90107  | 10.9665  | 3.92241  |
| O | 5.52294  | 5.35634  | 2.95659  |
| O | 11.30126 | 8.86167  | 7.36191  |
| O | -1.87726 | 7.46117  | 13.2751  |
| O | 5.52294  | 5.35634  | 7.36191  |
| O | 3.90107  | 10.9665  | 13.2751  |
| O | -1.87726 | 7.46117  | 10.80141 |
| O | 11.30126 | 8.86167  | 16.71459 |
| O | 3.90107  | 10.9665  | 10.80141 |
| O | 5.52294  | 5.35634  | 16.71459 |
| O | 11.30126 | 8.86167  | 14.24091 |
| O | -1.87726 | 7.46117  | 6.39609  |
| O | 5.52294  | 5.35634  | 14.24091 |
| O | 3.90107  | 10.9665  | 6.39609  |
| O | -1.87726 | 7.46117  | 17.68041 |
| O | 11.30126 | 8.86167  | 9.83559  |
| O | 3.90107  | 10.9665  | 17.68041 |
| O | 5.52294  | 5.35634  | 9.83559  |
| O | 6.7358   | 10.26625 | 0.48291  |
| O | 2.6882   | 6.05659  | 20.1541  |
| O | 2.6882   | 6.05659  | 3.92241  |
| O | 6.7358   | 10.26625 | 2.95659  |
| O | 6.7358   | 10.26625 | 7.36191  |
| O | 2.6882   | 6.05659  | 13.2751  |
| O | 2.6882   | 6.05659  | 10.80141 |
| O | 6.7358   | 10.26625 | 16.71459 |
| O | 6.7358   | 10.26625 | 14.24091 |
| O | 2.6882   | 6.05659  | 6.39609  |
| O | 2.6882   | 6.05659  | 17.68041 |
| O | 6.7358   | 10.26625 | 9.83559  |
| O | 4.712    | 8.16142  | 19.2956  |
| O | 4.712    | 8.16142  | 2.09809  |
| O | 4.712    | 8.16142  | 12.4166  |
| O | 4.712    | 8.16142  | 15.8561  |
| O | 4.712    | 8.16142  | 5.53759  |
| O | 4.712    | 8.16142  | 8.9771   |
| H | 4.712    | 8.16142  | 20.21876 |
| H | 4.712    | 8.16142  | 3.02126  |
| H | 4.712    | 8.16142  | 13.33976 |
| H | 4.712    | 8.16142  | 16.77926 |
| H | 4.712    | 8.16142  | 6.46076  |
| H | 4.712    | 8.16142  | 9.90026  |

OH down

|    |       |          |          |
|----|-------|----------|----------|
| Ca | 0.    | 5.44095  | 0.01032  |
| Ca | 9.424 | 10.8819  | 20.62668 |
| Ca | 4.712 | 13.60237 | 0.01032  |
| Ca | 4.712 | 2.72047  | 20.62668 |

|    |         |          |          |
|----|---------|----------|----------|
| Ca | 9.424   | 10.8819  | 3.44982  |
| Ca | 0.      | 5.44095  | 3.42918  |
| Ca | 4.712   | 2.72047  | 3.44982  |
| Ca | 4.712   | 13.60237 | 3.42918  |
| Ca | 0.      | 5.44095  | 6.88932  |
| Ca | 9.424   | 10.8819  | 13.74768 |
| Ca | 4.712   | 13.60237 | 6.88932  |
| Ca | 4.712   | 2.72047  | 13.74768 |
| Ca | 9.424   | 10.8819  | 10.32882 |
| Ca | 0.      | 5.44095  | 17.18718 |
| Ca | 4.712   | 2.72047  | 10.32882 |
| Ca | 4.712   | 13.60237 | 17.18718 |
| Ca | 0.      | 5.44095  | 13.76832 |
| Ca | 9.424   | 10.8819  | 6.86868  |
| Ca | 4.712   | 13.60237 | 13.76832 |
| Ca | 4.712   | 2.72047  | 6.86868  |
| Ca | 9.424   | 10.8819  | 17.20782 |
| Ca | 0.      | 5.44095  | 10.30818 |
| Ca | 4.712   | 2.72047  | 17.20782 |
| Ca | 4.712   | 13.60237 | 10.30818 |
| Ca | 9.424   | 5.44095  | 0.01032  |
| Ca | 0.      | 10.8819  | 20.62668 |
| Ca | 0.      | 10.8819  | 3.44982  |
| Ca | 9.424   | 5.44095  | 3.42918  |
| Ca | 9.424   | 5.44095  | 6.88932  |
| Ca | 0.      | 10.8819  | 13.74768 |
| Ca | 0.      | 10.8819  | 10.32882 |
| Ca | 9.424   | 5.44095  | 17.18718 |
| Ca | 9.424   | 5.44095  | 13.76832 |
| Ca | 0.      | 10.8819  | 6.86868  |
| Ca | 0.      | 10.8819  | 17.20782 |
| Ca | 9.424   | 5.44095  | 10.30818 |
| Ca | 3.58018 | 10.22953 | 1.71975  |
| Ca | 5.84382 | 6.09332  | 18.91725 |
| Ca | 5.84382 | 6.09332  | 5.15925  |
| Ca | 3.58018 | 10.22953 | 8.59875  |
| Ca | 5.84382 | 6.09332  | 12.03825 |
| Ca | 3.58018 | 10.22953 | 15.47775 |
| Ca | 7.06894 | 8.10756  | 1.71975  |
| Ca | 2.35506 | 8.21529  | 18.91725 |
| Ca | 2.35506 | 8.21529  | 5.15925  |
| Ca | 7.06894 | 8.10756  | 8.59875  |
| Ca | 2.35506 | 8.21529  | 12.03825 |
| Ca | 7.06894 | 8.10756  | 15.47775 |
| Ca | 3.48688 | 6.14718  | 1.71975  |
| Ca | 5.93712 | 10.17566 | 18.91725 |
| Ca | 5.93712 | 10.17566 | 5.15925  |
| Ca | 3.48688 | 6.14718  | 8.59875  |
| Ca | 5.93712 | 10.17566 | 12.03825 |
| Ca | 3.48688 | 6.14718  | 15.47775 |

|   |          |          |          |
|---|----------|----------|----------|
| P | 2.02098  | 3.00748  | 1.71975  |
| P | 7.40302  | 13.31536 | 18.91725 |
| P | 7.40302  | 13.31536 | 5.15925  |
| P | 2.02098  | 3.00748  | 8.59875  |
| P | 7.40302  | 13.31536 | 12.03825 |
| P | 2.02098  | 3.00748  | 15.47775 |
| P | 1.09695  | 8.4079   | 1.71975  |
| P | 8.32705  | 7.91495  | 18.91725 |
| P | 1.59407  | 13.06889 | 1.71975  |
| P | 7.82993  | 3.25396  | 18.91725 |
| P | 8.32705  | 7.91495  | 5.15925  |
| P | 7.82993  | 3.25396  | 5.15925  |
| P | 1.09695  | 8.4079   | 8.59875  |
| P | 8.32705  | 7.91495  | 12.03825 |
| P | 1.59407  | 13.06889 | 8.59875  |
| P | 7.82993  | 3.25396  | 12.03825 |
| P | 1.09695  | 8.4079   | 15.47775 |
| P | 1.59407  | 13.06889 | 15.47775 |
| P | 10.52095 | 8.4079   | 1.71975  |
| P | -1.09695 | 7.91495  | 18.91725 |
| P | 6.30607  | 4.90746  | 1.71975  |
| P | 3.11793  | 11.41538 | 18.91725 |
| P | -1.09695 | 7.91495  | 5.15925  |
| P | 3.11793  | 11.41538 | 5.15925  |
| P | 10.52095 | 8.4079   | 8.59875  |
| P | -1.09695 | 7.91495  | 12.03825 |
| P | 6.30607  | 4.90746  | 8.59875  |
| P | 3.11793  | 11.41538 | 12.03825 |
| P | 10.52095 | 8.4079   | 15.47775 |
| P | 6.30607  | 4.90746  | 15.47775 |
| P | 6.73298  | 11.16891 | 1.71975  |
| P | 2.69102  | 5.15394  | 18.91725 |
| P | 2.69102  | 5.15394  | 5.15925  |
| P | 6.73298  | 11.16891 | 8.59875  |
| P | 2.69102  | 5.15394  | 12.03825 |
| P | 6.73298  | 11.16891 | 15.47775 |
| O | 0.81046  | 3.95666  | 1.71975  |
| O | 8.61354  | 12.36619 | 18.91725 |
| O | 8.61354  | 12.36619 | 5.15925  |
| O | 0.81046  | 3.95666  | 8.59875  |
| O | 8.61354  | 12.36619 | 12.03825 |
| O | 0.81046  | 3.95666  | 15.47775 |
| O | 0.8802   | 6.88498  | 1.71975  |
| O | 8.5438   | 9.43787  | 18.91725 |
| O | 3.02134  | 13.64264 | 1.71975  |
| O | 6.40266  | 2.68021  | 18.91725 |
| O | 8.5438   | 9.43787  | 5.15925  |
| O | 6.40266  | 2.68021  | 5.15925  |
| O | 0.8802   | 6.88498  | 8.59875  |
| O | 8.5438   | 9.43787  | 12.03825 |

O 3.02134 13.64264 8.59875  
O 6.40266 2.68021 12.03825  
O 0.8802 6.88498 15.47775  
O 3.02134 13.64264 15.47775  
O 10.3042 6.88498 1.71975  
O -0.8802 9.43787 18.91725  
O 7.73333 5.48121 1.71975  
O 1.69067 10.84163 18.91725  
O -0.8802 9.43787 5.15925  
O 1.69067 10.84163 5.15925  
O 10.3042 6.88498 8.59875  
O -0.8802 9.43787 12.03825  
O 7.73333 5.48121 8.59875  
O 1.69067 10.84163 12.03825  
O 10.3042 6.88498 15.47775  
O 7.73333 5.48121 15.47775  
O 5.52246 12.11808 1.71975  
O 3.90154 4.20477 18.91725  
O 3.90154 4.20477 5.15925  
O 5.52246 12.11808 8.59875  
O 3.90154 4.20477 12.03825  
O 5.52246 12.11808 15.47775  
O 3.34316 3.79588 1.71975  
O 6.08084 12.52697 18.91725  
O 6.08084 12.52697 5.15925  
O 3.34316 3.79588 8.59875  
O 6.08084 12.52697 12.03825  
O 3.34316 3.79588 15.47775  
O -0.24691 9.15875 1.71975  
O 9.67091 7.1641 18.91725  
O 1.61574 11.52964 1.71975  
O 7.80825 4.7932 18.91725  
O 9.67091 7.1641 5.15925  
O 7.80825 4.7932 5.15925  
O -0.24691 9.15875 8.59875  
O 9.67091 7.1641 12.03825  
O 1.61574 11.52964 8.59875  
O 7.80825 4.7932 12.03825  
O -0.24691 9.15875 15.47775  
O 1.61574 11.52964 15.47775  
O 9.17709 9.15875 1.71975  
O 0.24691 7.1641 18.91725  
O 6.32775 3.36822 1.71975  
O 3.09626 12.95463 18.91725  
O 0.24691 7.1641 5.15925  
O 3.09626 12.95463 5.15925  
O 9.17709 9.15875 8.59875  
O 0.24691 7.1641 12.03825  
O 6.32775 3.36822 8.59875  
O 3.09626 12.95463 12.03825

|   |          |          |          |
|---|----------|----------|----------|
| O | 9.17709  | 9.15875  | 15.47775 |
| O | 6.32775  | 3.36822  | 15.47775 |
| O | 8.05516  | 11.9573  | 1.71975  |
| O | 1.36884  | 4.36555  | 18.91725 |
| O | 1.36884  | 4.36555  | 5.15925  |
| O | 8.05516  | 11.9573  | 8.59875  |
| O | 1.36884  | 4.36555  | 12.03825 |
| O | 8.05516  | 11.9573  | 15.47775 |
| O | 2.0238   | 2.10483  | 0.48291  |
| O | 7.4002   | 14.21801 | 20.1541  |
| O | 7.4002   | 14.21801 | 3.92241  |
| O | 2.0238   | 2.10483  | 2.95659  |
| O | 2.0238   | 2.10483  | 7.36191  |
| O | 7.4002   | 14.21801 | 13.2751  |
| O | 7.4002   | 14.21801 | 10.80141 |
| O | 2.0238   | 2.10483  | 16.71459 |
| O | 2.0238   | 2.10483  | 14.24091 |
| O | 7.4002   | 14.21801 | 6.39609  |
| O | 7.4002   | 14.21801 | 17.68041 |
| O | 2.0238   | 2.10483  | 9.83559  |
| O | 1.87726  | 8.86167  | 0.48291  |
| O | 7.54674  | 7.46117  | 20.1541  |
| O | 0.81093  | 13.51777 | 0.48291  |
| O | 8.61307  | 2.80508  | 20.1541  |
| O | 7.54674  | 7.46117  | 3.92241  |
| O | 1.87726  | 8.86167  | 2.95659  |
| O | 8.61307  | 2.80508  | 3.92241  |
| O | 0.81093  | 13.51777 | 2.95659  |
| O | 1.87726  | 8.86167  | 7.36191  |
| O | 7.54674  | 7.46117  | 13.2751  |
| O | 0.81093  | 13.51777 | 7.36191  |
| O | 8.61307  | 2.80508  | 13.2751  |
| O | 7.54674  | 7.46117  | 10.80141 |
| O | 1.87726  | 8.86167  | 16.71459 |
| O | 8.61307  | 2.80508  | 10.80141 |
| O | 0.81093  | 13.51777 | 16.71459 |
| O | 1.87726  | 8.86167  | 14.24091 |
| O | 7.54674  | 7.46117  | 6.39609  |
| O | 0.81093  | 13.51777 | 14.24091 |
| O | 8.61307  | 2.80508  | 6.39609  |
| O | 7.54674  | 7.46117  | 17.68041 |
| O | 1.87726  | 8.86167  | 9.83559  |
| O | 8.61307  | 2.80508  | 17.68041 |
| O | 0.81093  | 13.51777 | 9.83559  |
| O | 11.30126 | 8.86167  | 0.48291  |
| O | -1.87726 | 7.46117  | 20.1541  |
| O | 5.52294  | 5.35634  | 0.48291  |
| O | 3.90107  | 10.9665  | 20.1541  |
| O | -1.87726 | 7.46117  | 3.92241  |
| O | 11.30126 | 8.86167  | 2.95659  |

|   |          |          |          |
|---|----------|----------|----------|
| O | 3.90107  | 10.9665  | 3.92241  |
| O | 5.52294  | 5.35634  | 2.95659  |
| O | 11.30126 | 8.86167  | 7.36191  |
| O | -1.87726 | 7.46117  | 13.2751  |
| O | 5.52294  | 5.35634  | 7.36191  |
| O | 3.90107  | 10.9665  | 13.2751  |
| O | -1.87726 | 7.46117  | 10.80141 |
| O | 11.30126 | 8.86167  | 16.71459 |
| O | 3.90107  | 10.9665  | 10.80141 |
| O | 5.52294  | 5.35634  | 16.71459 |
| O | 11.30126 | 8.86167  | 14.24091 |
| O | -1.87726 | 7.46117  | 6.39609  |
| O | 5.52294  | 5.35634  | 14.24091 |
| O | 3.90107  | 10.9665  | 6.39609  |
| O | -1.87726 | 7.46117  | 17.68041 |
| O | 11.30126 | 8.86167  | 9.83559  |
| O | 3.90107  | 10.9665  | 17.68041 |
| O | 5.52294  | 5.35634  | 9.83559  |
| O | 6.7358   | 10.26625 | 0.48291  |
| O | 2.6882   | 6.05659  | 20.1541  |
| O | 2.6882   | 6.05659  | 3.92241  |
| O | 6.7358   | 10.26625 | 2.95659  |
| O | 6.7358   | 10.26625 | 7.36191  |
| O | 2.6882   | 6.05659  | 13.2751  |
| O | 2.6882   | 6.05659  | 10.80141 |
| O | 6.7358   | 10.26625 | 16.71459 |
| O | 6.7358   | 10.26625 | 14.24091 |
| O | 2.6882   | 6.05659  | 6.39609  |
| O | 2.6882   | 6.05659  | 17.68041 |
| O | 6.7358   | 10.26625 | 9.83559  |
| O | 4.712    | 8.16142  | 1.3414   |
| O | 4.712    | 8.16142  | 4.7809   |
| O | 4.712    | 8.16142  | 8.2204   |
| O | 4.712    | 8.16142  | 11.65991 |
| O | 4.712    | 8.16142  | 15.09941 |
| O | 4.712    | 8.16142  | 18.53891 |
| H | 4.712    | 8.16142  | 0.41824  |
| H | 4.712    | 8.16142  | 3.85774  |
| H | 4.712    | 8.16142  | 7.29724  |
| H | 4.712    | 8.16142  | 10.73674 |
| H | 4.712    | 8.16142  | 14.17624 |
| H | 4.712    | 8.16142  | 17.61574 |

**2.2 The calculated  $^1\text{H}$  and  $^{31}\text{P}$  isotropic shielding constants of  $\text{H}_3\text{PO}_4$ ,  $\text{H}_2\text{PO}_4^-$ ,  $\text{HPO}_4^{2-}$  and  $\text{PO}_4^{3-}$  moieties (in ppm); geometry optimization by B3LYP/cc-pVTZ, NMR -by PBE1PBE/cc-pVTZ**

|                           | $^{31}\text{P}$ | $^1\text{H}$ |
|---------------------------|-----------------|--------------|
| $\text{H}_3\text{PO}_4$   | 322.5           | 28.39        |
| $\text{H}_2\text{PO}_4^-$ | 321.1           | 30.13        |
| $\text{HPO}_4^{2-}$       | 303.6           | 30.94        |
| $\text{PO}_4^{3-}$        | 291.9           | -            |
